# Supplementary material for: High Performance Polymer Composites: A Role of Transfer Films in Ensuring Tribological Properties—A Review
Source: MDPI journal article supplement (doi:10.3390/polym14050975), 2022-02-28
Supplement: s1 [file s1]

**Table S1.** Summary on tribological studies of HPP composites

| HPP matrix            | Counterpart                    | Contact scheme | Conditions                    | Reference                                                                     |
|-----------------------|--------------------------------|----------------|-------------------------------|-------------------------------------------------------------------------------|
| <b>Point contact</b>  |                                |                |                               |                                                                               |
| PEEK                  | 100Cr6 steel                   | B-o-D          | DSF, RT                       | [24], [33], [46]                                                              |
| PEEK                  | Stainless steel                | B-o-D          | DSF, RT                       | [28]                                                                          |
| PEEK                  | AISI 52100 steel               | B-o-D          | DSF, RT                       | [30]                                                                          |
| PEEK                  | GCr15 steel                    | B-o-F          | DSF, RT                       | [25]                                                                          |
| PEEK                  | 100Cr6 steel                   | B-o-F          | DSF, RT                       | [31]                                                                          |
| PEEK                  | 100Cr6 steel                   | B-o-P          | DSF, RT                       | [29], [47]                                                                    |
| PEEK/PBI              | AISI 52100 steel               | B-o-D          | DSF, HT                       | [32], [37]                                                                    |
| PEEK                  | SUS 304 steel                  | B-o-D          | WL, RT                        | [34]                                                                          |
| PEEK                  | Alumina                        | B-o-D          | WL, RT                        | [58]                                                                          |
| PEEK                  | CoCrMo                         | B-o-D          | CSL, RT                       | [59]                                                                          |
| PPS                   | 100Cr6 steel                   | B-o-D          | DSF, RT                       | [26]                                                                          |
| PI                    | GCr15 steel                    | B-o-D          | DSF, RT                       | [36], [48], [49], [52]                                                        |
| PI                    | 100Cr6 steel                   | B-o-D          | DSF, RT                       | [45]                                                                          |
| PI                    | GCr15 steel                    | B-o-P          | DSF, RT                       | [51]                                                                          |
| PI                    | GCr15 steel                    | B-o-D          | DSF, HT                       | [35]                                                                          |
| PI                    | GCr15 steel                    | B-o-P          | DSF, HT                       | [42]                                                                          |
| PI                    | GCr15 steel                    | B-o-F          | RF, RT                        | [27], [50], [53]                                                              |
| PI                    | GCr15 steel                    | B-o-D          | SWL, RT                       | [54], [55], [56]                                                              |
| PI                    | Si <sub>3</sub> N <sub>4</sub> | B-o-D          | DSF, RT                       | [44]                                                                          |
| <b>Line contacts</b>  |                                |                |                               |                                                                               |
| PEEK, PEI, PES        | 30CrMnSiA steel                | B-o-R          | DSF, RT                       | [65]                                                                          |
| PEEK                  | AISI 316 steel                 | B-o-R          | DSF, RT                       | [67], [69], [96], [102], [103]                                                |
| PEEK                  | 100Cr6 steel                   | B-o-R          | DSF, RT                       | [80], [81], [82], [84], [85], [86], [104], [105]                              |
| PEEK                  | GCr15 steel                    | B-o-R          | DSF, RT                       | [100], [106], [107]                                                           |
| PEEK                  | X10CrNiMoTi1810                | B-o-R          | DSF, RT                       | [68]                                                                          |
| PPS                   | AISI 1045 steel                | B-o-R          | DSF, RT                       | [64], [70], [76], [88], [101]                                                 |
| PPS                   | titanium alloy                 | B-o-R          | DSF, RT                       | [66], [77]                                                                    |
| PI                    | AISI 1045 steel                | B-o-R          | DSF, RT                       | [61], [62], [71], [89], [90], [91]                                            |
| PI                    | GCr15 steel                    | B-o-R          | DSF, RT                       | [72], [73], [74], [75], [78], [83], [92], [93], [94], [95], [97], [98], [107] |
| PI                    | 440C steel                     | B-o-R          | DSF, RT                       | [99]                                                                          |
| PAEK                  | Mild steel                     | B-o-R          | DSF, RT                       | [108]                                                                         |
| <b>Plane contacts</b> |                                |                |                               |                                                                               |
| PEEK                  | AISI 1045 steel                | P-o-D          | DSF, RT                       | [136]                                                                         |
| PEEK                  | GCr15 steel                    | P-o-D          | DSF, RT                       | [60], [109], [110], [121]                                                     |
| PEEK                  | 100Cr6 steel                   | P-o-D          | DSF, RT                       | [119], [137], [145], [151]                                                    |
| PEEK                  | AISI 52100 steel               | P-o-D          | DSF, RT                       | [152]                                                                         |
| PEEK                  | AISI 304 steel                 | P-o-D          | DSF, HT                       | [146], [148]                                                                  |
| PEEK                  | Si <sub>3</sub> N <sub>4</sub> | P-o-D          | DSF, RT                       | [125]                                                                         |
| PEEK                  | GCr15 steel                    | P-o-D          | WL, RT                        | [120], [126]                                                                  |
| PEEK, PPS             | Cr-Mo steel pin                | P-o-D          | WL, RT                        | [116], [128]                                                                  |
| PEEK                  | 52100 and 304 steels           | P-o-D          | air, high vacuum and hydrogen | [118]                                                                         |
| PEEK                  | 4Cr13 steel disk               | P-o-D          | WL, RT                        | [166]                                                                         |
| PPS                   | 100Cr6 steel                   | P-o-D          | DSF, RT                       | [111], [112], [113], [133], [153], [154], [155]                               |
| PPS, PEI, PPSU        | 100Cr6 steel                   | P-o-D          | DSF, RT                       | [113]                                                                         |
| PPS, PES, PSU         | 1Cr18Ni9Ti steel               | P-o-D          | DSF, RT                       | [115]                                                                         |
| PPS                   | AISI D2 steel                  | P-o-D          | DSF, RT                       | [122], [136], [138]                                                           |

|      |                                          |       |         |                                   |
|------|------------------------------------------|-------|---------|-----------------------------------|
| PPS  | 100Cr6 steel                             | P-o-D | DSF, RT | [147]                             |
| PAEK | Mild steel                               | P-o-D | DSF, RT | [123], [139], [143], [161], [162] |
| PAI  | Stainless steel                          | P-o-D | DSF, RT | [132]                             |
| PI   | C45 steel                                | P-o-D | DSF, RT | [124], [158]                      |
| PI   | Aluminum alloy, bronze,<br>bearing steel | P-o-D | DSF, RT | [134]                             |
| PI   | Bronze                                   | P-o-F | DSF, RT | [140]                             |
| PI   | MCS35 steel and a<br>NiCrBSi alloy       | P-o-D | DSF, RT | [157]                             |
| PI   | AISI 1045 steel                          | P-o-D | DSF, RT | [164]                             |
| PI   | Copper                                   | P-o-D | SWL, RT | [149]                             |
| PI   | AISI 1045 steel                          | P-o-D | WL, RT  | [165]                             |
